# Supplementary material
Source: PubMed Central journal article supplement (PMC8454546)
Supplement: mmc1.pdf [file mmc1.pdf]

**The Innovation, Volume 2**

**Supplemental Information**

**Genetic correlations between COVID-19  
and a variety of traits and diseases**

**Xiao Chang, Yun Li, Kenny Nguyen, Huiqi Qu, Yichuan Liu, Joseph Glessner, Patrick M.A. Sleiman, and Hakon Hakonarson**

## Supplementary Information:

### Estimation of genetic correlation

We calculated the genome-wide genetic correlations ( $r_g$ ) between COVID-19 and a variety of traits and diseases using LD score regression method <sup>[1]</sup>, which is based on the relationship between LD score and  $\chi^2$ -statistics:  $E[\chi_j^2] \approx \frac{N_j h_g^2}{M} l_j + 1$ , where  $E[\chi_j^2]$  is the expected  $\chi^2$ -statistics between SNP  $j$  and the outcome,  $N_j$  is the sample size of study,  $M$  is the number of all variants, and  $l_j$  is the LD score of SNP  $j$  ( $l_j = \sum_k(j, k)$ ,  $k$  is other variants within the LD region).

The LD score regression equation is  $E[\beta_j \gamma_j] \approx \frac{\sqrt{N_1 N_2} r_g}{M} l_j + \frac{N_s r}{\sqrt{N_1 N_2}}$ , where  $\beta_j$  and  $\gamma_j$  denote the effect size of SNP  $j$  on the two tested traits,  $N_1$  and  $N_2$  are the sample sizes of two tested traits,  $N_s$  is the number of overlapping samples between two tested traits,  $r$  is the phenotypic correlation in overlapping samples and  $l_j$  is the aforementioned LD score. The LD score regression method has been implemented in the LDSC software (<https://github.com/bulik/ldsc>). Genetic correlation  $r_g$  between COVID-19 and interested diseases/traits were estimated by LDSC using GWAS summary statistics that overlap with HapMap3 SNPs as recommended <sup>[1]</sup>. Pre-computed linkage disequilibrium scores for HapMap3 SNPs calculated based on European-ancestry individuals from the 1000 Genomes Project were used in the analysis.

**Table S1. Genetic correlations between COVID-19 and a variety of diseases and other medically relevant traits**

| Source                                                           | Disease/Trait                                                | Reference          | A2_ALL      |           |             | B2_ALL      |            |             | B2_ALL_eur  |          |             | C2_ALL_eur  |        |       |
|------------------------------------------------------------------|--------------------------------------------------------------|--------------------|-------------|-----------|-------------|-------------|------------|-------------|-------------|----------|-------------|-------------|--------|-------|
|                                                                  |                                                              |                    | rg(se)      | P         | P-adj       | rg(se)      | P          | P-adj       | rg(se)      | P        | P-adj       | rg(se)      | P      | P-adj |
| UK<br>biobank                                                    | Diseases of the circulatory system                           | IX_CIRCULATORY     | 0.34 (0.08) | 2.20E-05* | 0.0342      | 0.38 (0.09) | 4.33E-05   | 0.0673      | 0.32 (0.10) | 0.0012   | 1           | 0.22 (0.11) | 0.0422 | 1     |
|                                                                  | Diseases of the digestive system                             | XI_DIGESTIVE       | 0.25 (0.07) | 0.0004    | 0.622       | 0.37 (0.08) | 5.38E-06** | 0.0083      | 0.38 (0.10) | 8.40E-05 | 0.1306      | 0.08 (0.09) | 0.3429 | 1     |
|                                                                  | Diseases of the musculoskeletal system and connective tissue | XIII_MUSCULOSKELET | 0.33 (0.07) | 1.38E-05* | 0.0215      | 0.35 (0.09) | 0.0001     | 0.1555      | 0.34 (0.10) | 0.001    | 1           | 0.15 (0.10) | 0.1371 | 1     |
|                                                                  | COPD, early/late onset                                       | COPD_EARLYANDLATER | 0.50 (0.15) | 0.0011    | 1           | 0.55 (0.16) | 0.0006     | 0.933       | 0.46 (0.17) | 0.0081   | 1           | 0.33 (0.18) | 0.0696 | 1     |
|                                                                  | COPD differential diagnosis                                  | COPD_EXCL          | 0.16 (0.10) | 0.1164    | 1           | 0.32 (0.11) | 0.0041     | 1           | 0.31 (0.13) | 0.0146   | 1           | 0.27 (0.14) | 0.0434 | 1     |
|                                                                  | Major coronary heart disease event                           | I9_CHD             | 0.24 (0.09) | 0.0088    | 1           | 0.26 (0.10) | 0.0117     | 1           | 0.19 (0.11) | 0.0786   | 1           | 0.07 (0.12) | 0.5347 | 1     |
|                                                                  | Ischaemic heart disease, wide definition                     | I9_IHD             | 0.24 (0.08) | 0.0014    | 1           | 0.30 (0.09) | 0.0006     | 0.933       | 0.22 (0.09) | 0.0155   | 1           | 0.14 (0.09) | 0.1447 | 1     |
|                                                                  | Vascular/heart problems diagnosed by doctor: Heart attack    | 6150_1             | 0.33 (0.09) | 0.0003    | 0.4665      | 0.35 (0.11) | 0.002      | 1           | 0.30 (0.12) | 0.0126   | 1           | 0.19 (0.12) | 0.1119 | 1     |
|                                                                  | Vascular/heart problems diagnosed by doctor: Angina          | 6150_2             | 0.28 (0.09) | 0.0017    | 1           | 0.36 (0.11) | 0.0014     | 1           | 0.26 (0.11) | 0.0169   | 1           | 0.23 (0.11) | 0.0339 | 1     |
| Vascular/heart problems diagnosed by doctor: High blood pressure | 6150_4                                                       | 0.17 (0.05)        | 0.0011      | 1         | 0.22 (0.07) | 0.0016      | 1          | 0.19 (0.07) | 0.0065      | 1        | 0.21 (0.08) | 0.0077      | 1      |       |

|                                                                        |                       |              |              |         |              |              |        |              |              |        |              |               |        |       |
|------------------------------------------------------------------------|-----------------------|--------------|--------------|---------|--------------|--------------|--------|--------------|--------------|--------|--------------|---------------|--------|-------|
| Non-cancer illness code, self-reported: stroke                         | 20002_1081            | 0.53 (0.22)  | 0.0158       | 1       | 0.50 (0.22)  | 0.0206       | 1      | 0.47 (0.23)  | 0.0452       | 1      | 0.32 (0.26)  | 0.2232        | 1      |       |
| Non-cancer illness code, self-reported: diabetes                       | 20002_1220            | 0.28 (0.08)  | 0.0003       | 0.4665  | 0.36 (0.09)  | 7.96E-05     | 0.1237 | 0.38 (0.10)  | 0.0003       | 0.4665 | 0.24 (0.09)  | 0.0092        | 1      |       |
| Non-cancer illness code, self-reported: osteoarthritis                 | 20002_1465            | 0.28 (0.10)  | 0.0042       | 1       | 0.27 (0.09)  | 0.0045       | 1      | 0.25 (0.10)  | 0.0164       | 1      | 0.02 (0.11)  | 0.8331        | 1      |       |
| Non-cancer illness code, self-reported: high cholesterol               | 20002_1473            | 0.19 (0.07)  | 0.0071       | 1       | 0.19 (0.08)  | 0.0172       | 1      | 0.19 (0.09)  | 0.0281       | 1      | 0.00 (0.08)  | 0.9863        | 1      |       |
| Smoking status: Never                                                  | 20116_0               | -0.06 (0.05) | 0.2025       | 1       | -0.22 (0.06) | 0.0005       | 0.7775 | -0.22 (0.07) | 0.0024       | 1      | -0.06 (0.07) | 0.4181        | 1      |       |
| Smoking status: Current                                                | 20116_2               | 0.20 (0.06)  | 0.0014       | 1       | 0.35 (0.08)  | 1.97E-05*    | 0.0306 | 0.34 (0.09)  | 0.0002       | 0.311  | 0.13 (0.09)  | 0.146         | 1      |       |
| Body mass index (BMI)                                                  | 21001_imt             | 0.24 (0.05)  | 3.35E-06**   | 0.0052  | 0.39 (0.08)  | 3.33E-07***  | 0.0005 | 0.32 (0.08)  | 3.89E-05     | 0.0604 | 0.25 (0.07)  | 0.0008        | 1      |       |
| Age hay fever, rhinitis or eczema diagnosed                            | 3761_imt              | 0.27 (0.08)  | 0.0005       | 0.7775  | 0.27 (0.10)  | 0.0064       | 1      | 0.28 (0.10)  | 0.0058       | 1      | 0.29 (0.13)  | 0.0245        | 1      |       |
| Age asthma diagnosed                                                   | 3786_imt              | 0.15 (0.09)  | 0.1012       | 1       | 0.12 (0.10)  | 0.2563       | 1      | 0.07 (0.12)  | 0.5406       | 1      | -0.03 (0.13) | 0.8299        | 1      |       |
| Fluid intelligence score                                               | 20016_imt             | -0.25 (0.06) | 2.40E-05*    | 0.0373  | -0.26 (0.07) | 7.66E-05*    | 0.1191 | -0.25 (0.08) | 0.001        | 1      | -0.13 (0.08) | 0.083         | 1      |       |
| Qualifications: College or University degree                           | 6138_1                | -0.24 (0.05) | 8.51E-07**   | 0.0013  | -0.32 (0.07) | 1.78E-06**   | 0.0028 | -0.28 (0.07) | 9.62E-05     | 0.1496 | -0.23 (0.07) | 0.0016        | 1      |       |
| Mental health problems ever diagnosed by a professional: Panic attacks | 20544_6               | 0.40 (0.12)  | 0.001        | 1       | 0.73 (0.16)  | 8.60E-06*    | 0.0134 | 0.64 (0.17)  | 0.0001       | 0.1555 | 0.38 (0.19)  | 0.0416        | 1      |       |
| Seen doctor (GP) for nerves, anxiety, tension or depression            | 2090                  | 0.18 (0.06)  | 0.002        | 1       | 0.20 (0.07)  | 0.0022       | 1      | 0.18 (0.07)  | 0.0087       | 1      | -0.03 (0.07) | 0.6765        | 1      |       |
| Medication related adverse effects (Asthma/COPD)                       | PULM_MEDICATIO_COMORB | 0.28 (0.10)  | 0.0059       | 1       | 0.32 (0.11)  | 0.0052       | 1      | 0.36 (0.12)  | 0.0022       | 1      | 0.15 (0.14)  | 0.2894        | 1      |       |
| Treatment/medication code: ramipril                                    | 20003_1140860806      | 0.31 (0.10)  | 0.0013       | 1       | 0.44 (0.12)  | 0.0004       | 0.622  | 0.34 (0.13)  | 0.0095       | 1      | 0.24 (0.13)  | 0.0565        | 1      |       |
| Treatment/medication code: simvastatin                                 | 20003_1140861958      | 0.26 (0.08)  | 0.001        | 1       | 0.26 (0.09)  | 0.0055       | 1      | 0.28 (0.10)  | 0.0046       | 1      | 0.07 (0.09)  | 0.432         | 1      |       |
| Treatment/medication code: tramadol                                    | 20003_1140864992      | 0.52 (0.13)  | 7.61E-05     | 0.1183  | 0.65 (0.15)  | 1.26E-05*    | 0.0196 | 0.63 (0.16)  | 5.30E-05     | 0.0824 | 0.49 (0.17)  | 0.0031        | 1      |       |
| Treatment/medication code: omeprazole                                  | 20003_1140865634      | 0.22 (0.09)  | 0.017        | 1       | 0.36 (0.10)  | 0.0004       | 0.622  | 0.30 (0.11)  | 0.0049       | 1      | 0.06 (0.13)  | 0.6624        | 1      |       |
| Treatment/medication code: aspirin                                     | 20003_1140868226      | 0.24 (0.09)  | 0.0067       | 1       | 0.32 (0.11)  | 0.0047       | 1      | 0.29 (0.12)  | 0.0162       | 1      | 0.17 (0.12)  | 0.1578        | 1      |       |
| Treatment/medication code: amitriptyline                               | 20003_1140879616      | 0.38 (0.13)  | 0.0031       | 1       | 0.49 (0.16)  | 0.0016       | 1      | 0.44 (0.16)  | 0.0059       | 1      | 0.22 (0.16)  | 0.167         | 1      |       |
| Treatment/medication code: metformin                                   | 20003_1140884600      | 0.23 (0.08)  | 0.0045       | 1       | 0.31 (0.10)  | 0.0015       | 1      | 0.33 (0.11)  | 0.0016       | 1      | 0.20 (0.10)  | 0.0427        | 1      |       |
| Treatment/medication code: co-codamol                                  | 20003_1140923346      | 0.40 (0.11)  | 0.0002       | 0.311   | 0.49 (0.13)  | 0.0001       | 0.1555 | 0.32 (0.13)  | 0.0171       | 1      | 0.07 (0.15)  | 0.6292        | 1      |       |
| Treatment/medication code: paracetamol                                 | 20003_2038460150      | 0.26 (0.07)  | 0.0003       | 0.4665  | 0.35 (0.09)  | 0.0002       | 0.311  | 0.27 (0.10)  | 0.0038       | 1      | -0.02 (0.10) | 0.814         | 1      |       |
| GWAS Catalog                                                           | ADHD                  | 30478444     | -0.23 (0.07) | 0.0017  | 0.136        | -0.26 (0.09) | 0.0021 | 0.168        | -0.23 (0.09) | 0.0079 | 0.632        | -0.05 (0.10)  | 0.5699 | 1     |
|                                                                        | Autism                | 30804558     | -0.01 (0.09) | 0.9165  | 1            | 0.08 (0.11)  | 0.4675 | 1            | 0.11 (0.11)  | 0.3164 | 1            | 0.08 (0.13)   | 0.546  | 1     |
|                                                                        | Depression            | 30718901     | -0.15 (0.05) | 0.0029  | 0.232        | -0.16 (0.06) | 0.0049 | 0.232        | -0.13 (0.06) | 0.0248 | 0.232        | 0.0219 (0.07) | 0.7407 | 0.232 |
|                                                                        | Schizophrenia         | 25056061     | -0.07 (0.05) | 0.1711  | 1            | -0.06 (0.06) | 0.3    | 1            | -0.08 (0.06) | 0.1469 | 1            | -0.04 (0.07)  | 0.6006 | 1     |
|                                                                        | Asthma                | 29785011     | -0.16 (0.08) | 0.037   | 1            | -0.12 (0.09) | 0.1763 | 1            | -0.15 (0.10) | 0.1386 | 1            | -0.27 (0.12)  | 0.0263 | 1     |
|                                                                        | Allergy               | 29785011     | -0.20 (0.07) | 0.0067  | 0.536        | -0.26 (0.09) | 0.0046 | 0.368        | -0.19 (0.10) | 0.0511 | 1            | -0.32 (0.12)  | 0.0078 | 0.624 |
|                                                                        | SLE                   | 26502338     | -0.37 (0.11) | 0.0006* | 0.048        | -0.27 (0.13) | 0.0489 | 1            | -0.27 (0.15) | 0.0736 | 1            | -0.23 (0.17)  | 0.1758 | 1     |

|                                                              |          |              |             |          |              |             |          |              |          |        |              |        |       |
|--------------------------------------------------------------|----------|--------------|-------------|----------|--------------|-------------|----------|--------------|----------|--------|--------------|--------|-------|
| Smoking (age of initiation)                                  | 30643251 | -0.23 (0.07) | 0.0008      | 0.064    | -0.32 (0.08) | 0.0001**    | 0.008    | -0.24 (0.08) | 0.0035   | 0.28   | -0.15 (0.09) | 0.0998 | 1     |
| Smoking (initiation)                                         | 30643251 | 0.10 (0.05)  | 0.0274      | 1        | 0.19 (0.06)  | 0.0005*     | 0.04     | 0.18 (0.06)  | 0.0026   | 0.208  | 0.05 (0.07)  | 0.4577 | 1     |
| Smoking (cessation)                                          | 30643251 | 0.27 (0.07)  | 0.0003*     | 0.024    | 0.42 (0.08)  | 3.60E-07*** | 2.88E-05 | 0.39 (0.09)  | 2.06E-05 | 0.0016 | 0.09 (0.11)  | 0.4288 | 1     |
| Smoking (cigarettes per day)                                 | 30643251 | 0.16 (0.06)  | 0.0048      | 0.384    | 0.26 (0.06)  | 3.88E-05**  | 0.0031   | 0.17 (0.07)  | 0.0097   | 0.776  | 0.00 (0.08)  | 0.9573 | 1     |
| Hypertension                                                 | 30940143 | 0.21 (0.06)  | 0.0005*     | 0.04     | 0.27 (0.08)  | 0.0005*     | 0.04     | 0.18 (0.07)  | 0.0077   | 0.616  | 0.18 (0.08)  | 0.022  | 1     |
| Coronary artery disease                                      | 28714975 | 0.22 (0.07)  | 0.001       | 0.08     | 0.20 (0.07)  | 0.0077      | 0.616    | 0.20 (0.08)  | 0.0113   | 0.904  | 0.11 (0.09)  | 0.207  | 1     |
| Heart failure                                                | 31919418 | 0.20 (0.09)  | 0.0205      | 1        | 0.24 (0.09)  | 0.0103      | 0.824    | 0.22 (0.11)  | 0.0468   | 1      | 0.17 (0.12)  | 0.1823 | 1     |
| Type 2 diabetes                                              | 25056061 | 0.22 (0.06)  | 0.0003*     | 0.024    | 0.31 (0.07)  | 3.75E-05**  | 0.003    | 0.29 (0.08)  | 0.0002   | 0.016  | 0.20 (0.08)  | 0.0107 | 0.856 |
| Obesity                                                      | 30677029 | 0.35 (0.13)  | 0.0082      | 0.656    | 0.55 (0.15)  | 0.0003*     | 0.024    | 0.55 (0.17)  | 0.0008   | 0.064  | 0.44 (0.17)  | 0.0092 | 0.736 |
| BMI                                                          | 23563607 | 0.26 (0.10)  | 0.0079      | 0.632    | 0.41 (0.13)  | 0.0016      | 0.128    | 0.29 (0.12)  | 0.0132   | 1      | 0.22 (0.15)  | 0.1477 | 1     |
| Drugs for peptic ulcer and gastro-oesophageal reflux disease | 31015401 | 0.23 (0.07)  | 0.0007      | 0.056    | 0.34 (0.08)  | 3.01E-05**  | 0.0024   | 0.28 (0.08)  | 0.0006   | 0.048  | 0.05 (0.10)  | 0.6493 | 1     |
| Drugs for diabetes                                           | 31015401 | 0.17 (0.07)  | 0.0214      | 1        | 0.24 (0.08)  | 0.004       | 0.32     | 0.26 (0.09)  | 0.0042   | 0.336  | 0.19 (0.10)  | 0.0524 | 1     |
| Antithrombotic agents                                        | 31015401 | 0.24 (0.09)  | 0.0085      | 0.68     | 0.28 (0.12)  | 0.0191      | 1        | 0.28 (0.12)  | 0.0266   | 1      | 0.29 (0.14)  | 0.0477 | 1     |
| Vasodilators for cardiac diseases                            | 31015401 | 0.33 (0.12)  | 0.0068      | 0.544    | 0.48 (0.16)  | 0.0021      | 0.168    | 0.43 (0.17)  | 0.0095   | 0.76   | 0.51 (0.21)  | 0.0151 | 1     |
| Antihypertensives                                            | 31015401 | 0.30 (0.12)  | 0.0163      | 1        | 0.41 (0.14)  | 0.0049      | 0.392    | 0.40 (0.16)  | 0.0098   | 0.784  | 0.22 (0.17)  | 0.1972 | 1     |
| Diuretic use                                                 | 31015401 | 0.25 (0.07)  | 0.0002*     | 0.016    | 0.26 (0.08)  | 0.0018      | 0.144    | 0.29 (0.09)  | 0.0011   | 0.088  | 0.25 (0.11)  | 0.0196 | 1     |
| Beta blocking agents                                         | 31015401 | 0.20 (0.07)  | 0.0078      | 0.624    | 0.22 (0.09)  | 0.0147      | 1        | 0.17 (0.09)  | 0.0762   | 1      | 0.09 (0.11)  | 0.3954 | 1     |
| Agents acting on the renin-angiotensin system                | 31015401 | 0.19 (0.06)  | 0.001       | 0.08     | 0.21 (0.08)  | 0.0062      | 0.496    | 0.22 (0.08)  | 0.0068   | 0.544  | 0.19 (0.09)  | 0.0357 | 1     |
| HMG CoA reductase inhibitors                                 | 31015401 | 0.22 (0.07)  | 0.0012      | 0.096    | 0.20 (0.08)  | 0.0121      | 0.968    | 0.22 (0.09)  | 0.0112   | 0.896  | 0.08 (0.09)  | 0.3783 | 1     |
| Opioids                                                      | 31015401 | 0.30 (0.07)  | 5.59E-05**  | 0.0045   | 0.44 (0.09)  | 4.78E-07*** | 3.82E-05 | 0.38 (0.10)  | 0.0002   | 0.016  | 0.26 (0.11)  | 0.0229 | 1     |
| Subjective well-being                                        | 27089181 | 0.17 (0.09)  | 0.0682      | 1        | 0.09 (0.10)  | 0.3818      | 1        | 0.11 (0.11)  | 0.311    | 1      | 0.14 (0.14)  | 0.3173 | 1     |
| Educational attainment (years of education)                  | 27225129 | -0.33 (0.06) | 1.90E-09*** | 1.52E-07 | -0.41 (0.07) | 1.82E-08*** | 1.46E-06 | -0.35 (0.07) | 2.07E-06 | 0.0002 | -0.24 (0.08) | 0.003  | 0.24  |
| Neuroticism                                                  | 27089181 | 0.00 (0.07)  | 0.9995      | 1        | -0.01 (0.09) | 0.9161      | 1        | -0.04 (0.10) | 0.6917   | 1      | -0.07 (0.12) | 0.5659 | 1     |
| Cognitive performance                                        | 30038396 | -0.22 (0.05) | 3.95E-06    | 0.0003   | -0.21 (0.06) | 0.0001**    | 0.008    | -0.20 (0.06) | 0.0006   | 0.048  | -0.22 (0.07) | 0.0034 | 0.272 |
| Memory performance                                           | 27046643 | 0.07 (0.10)  | 0.5018      | 1        | 0.07 (0.11)  | 0.5433      | 1        | 0.15 (0.11)  | 0.199    | 1      | 0.13 (0.12)  | 0.2675 | 1     |
| Reaction time                                                | 27046643 | 0.08 (0.08)  | 0.3163      | 1        | 0.03 (0.08)  | 0.6847      | 1        | -0.03 (0.09) | 0.7716   | 1      | -0.05 (0.11) | 0.6457 | 1     |
| Verbal-numerical reasoning                                   | 27046643 | -0.33 (0.09) | 0.0002*     | 0.016    | -0.33 (0.10) | 0.0007      | 0.056    | -0.35 (0.11) | 0.0018   | 0.144  | -0.30 (0.13) | 0.0164 | 1     |

Genetic correlation estimates, standard errors and p-values for COVID-19 and selected diseases/traits. The “Reference” column lists the phenotype code for the GWAS from UK biobank, and PMID (PubMed ID) for the GWAS from GWAS Catalog. The *P*-values are uncorrected *P*-values. Bonferroni correction was used for correction of multiple testing by the number of tests (1555 for the analysis of data from UK biobank, and 80 for the analysis of data

GWAS Catalog. For genetic correlations between COVID-19 and UK biobank traits, the significance level is  $0.05/1555 = 3.22 \times 10^{-5}$ . For genetic correlations between COVID-19 and GWAS catalog traits, the significance level is  $0.05/80 = 6.25 \times 10^{-4}$ . \*\*\* adjusted  $P$ -value  $\leq 0.001$ , \*\* adjusted  $P$ -value  $\leq 0.01$ , \* adjusted  $P$ -value  $\leq 0.05$ . BMI = body mass index; SLE = systemic lupus erythematosus; rg = genetic correlation estimates; se = standard error, A2\_ALL = very severe respiratory confirmed COVID-19 vs population, B2\_ALL = hospitalized COVID-19 vs population, B2\_ALL\_eur = hospitalized COVID-19 vs population (European samples only), C2\_ALL\_eur = COVID-19 vs population (European samples only).

1. Bulik-Sullivan BK, Loh PR, Finucane HK, Ripke S, Yang J, Schizophrenia Working Group of the Psychiatric Genomics C, *et al.* LD Score regression distinguishes confounding from polygenicity in genome-wide association studies. **Nat Genet** 2015, 47(3): 291-295.
