# Supplementary material
Source: PubMed Central journal article supplement (PMC8454546)
Supplement: mmc2.pdf [file mmc2.pdf]

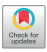

# Genetic correlations between COVID-19 and a variety of traits and diseases

Xiao Chang,<sup>1,5</sup> Yun Li,<sup>2,5</sup> Kenny Nguyen,<sup>1</sup> Huiqi Qu,<sup>1</sup> Yichuan Liu,<sup>1</sup> Joseph Glessner,<sup>1</sup> Patrick M.A. Sleiman,<sup>1,3,4</sup> and Hakon Hakonarson<sup>1,3,4,\*</sup>

<sup>1</sup>The Center for Applied Genomics, Children’s Hospital of Philadelphia, Philadelphia, PA 19104, USA

<sup>2</sup>Department of Biostatistics and Epidemiology, The Perelman School of Medicine, University of Pennsylvania, Philadelphia, PA 19104, USA

<sup>3</sup>Department of Pediatrics, The Perelman School of Medicine, University of Pennsylvania, PA 19104, USA

<sup>4</sup>Division of Human Genetics, Children’s Hospital of Philadelphia, Philadelphia, PA 19104, USA

<sup>5</sup>These authors contributed equally

\*Correspondence: [hakonarson@email.chop.edu](mailto:hakonarson@email.chop.edu)

Received: December 21, 2020; Accepted: April 27, 2021; Published Online: April 28, 2021; <https://doi.org/10.1016/j.xinn.2021.100112>

© 2021 The Authors. This is an open access article under the CC BY-NC-ND license (<http://creativecommons.org/licenses/by-nc-nd/4.0/>).

Citation: Chang X., Li Y., Nguyen K., Qu H., Liu Y., Glessner J., Sleiman P.M.A., and Hakonarson H. (2021). Genetic correlations between COVID-19 and a variety of traits and diseases. *The Innovation* 2(2), 100112.

The ongoing coronavirus disease (COVID-19) outbreak has posed an extraordinary threat to global public health. Patients with certain underlying medical conditions, such as obesity, hypertension, and diabetes are at increased risk for poor outcome in COVID-19.<sup>1</sup> Given the high genetic heritability of the aforementioned conditions, their shared genetic factors may play a crucial role in the severity of COVID-19. Indeed, a recent genome-wide association study (GWAS) of COVID-19 has reported two genomic loci associated with severe COVID-19, indicating a strong genetic influence on the severity of COVID-19.<sup>2</sup> Here, we analyzed GWAS results released by the COVID-19 Host Genetics Initiative,<sup>3</sup> the UK biobank, and the GWAS Catalog to explore the genetic overlap between COVID-19 and a broad spectrum of traits and diseases (Figure 1).

Summary statistics of selected COVID-19 GWAS (sample size >30,000 and percentage of Europeans >90%) were downloaded from COVID-19 Host Genetics Initiative, including A2\_ALL (very severe respiratory confirmed COVID-19 against population), B2\_ALL (hospitalized COVID-19 against population), B2\_ALL\_eur (hospitalized COVID-19 against population in Europeans), and C2\_ALL\_eur (COVID-19 against population in Europeans). GWAS sum-

mary statistics of selected diseases/traits were downloaded from the UK biobank and the GWAS Catalog.<sup>4</sup> Genetic correlation  $r_g$  between COVID-19 and interested diseases/traits were estimated by LD (linkage disequilibrium) score regression using GWAS summary statistics that overlap with HapMap3 SNPs as recommended. Pre-computed linkage disequilibrium scores for HapMap3 SNPs calculated based on European-ancestry individuals from the 1000 Genomes Project were used in the analysis (supplemental information).

We first investigated genetic correlations between COVID-19 and 1,555 diseases/traits from the analysis of UK biobank data by the Neale lab (<http://www.nealelab.is/uk-biobank/>) as described in Figure 1. Our results are consistent with the epidemiological observation that BMI is significantly associated with severe or hospitalized COVID-19 (A2\_ALL,  $r_g = 0.24$ ,  $p = 3.35 \times 10^{-6}$ ; B2\_ALL,  $r_g = 0.39$ ,  $p = 3.33 \times 10^{-7}$ ). COPD (chronic obstructive pulmonary disease), heart diseases, hypertension, diabetes, and smoking status exhibit substantial magnitude of genetic correlation with COVID-19, although statistical significance does not pass the strict threshold after adjustment for multiple testing (Table S1). Collectively, diseases of the

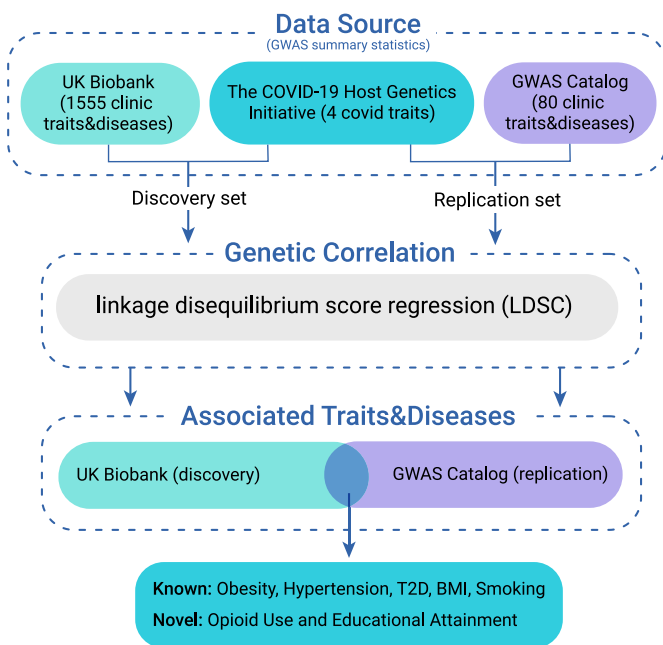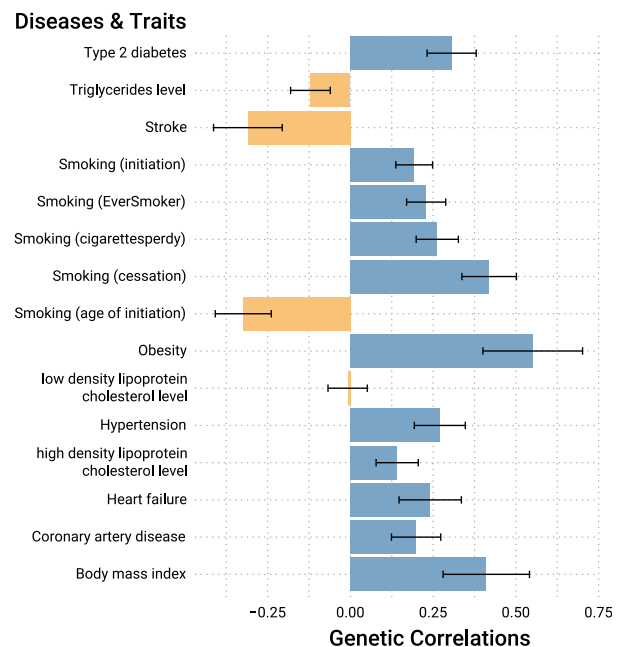

Figure 1. Flowchart of data preparation and analysis for COVID-19 and tested traits/diseases in this study More details of genetic correlation results are provided in [https://roarchang.shinyapps.io/COV19\\_GC/](https://roarchang.shinyapps.io/COV19_GC/).

circulatory system, diseases of the digestive system, and diseases of the musculoskeletal system and connective tissue are significantly associated with severe or hospitalized COVID-19 (Table S1). In agreement with this, a number of medication-taking traits linked to obesity, diabetes, hypertension, and digestion display modest correlation with COVID-19 (Table S1). Tramadol, an opioid pain medication, is significantly correlated with hospitalized COVID-19 ( $B2\_ALL$ ,  $rg = 0.65$ ,  $p = 1.26 \times 10^{-5}$ ). Interestingly, our results indicated a significant negative correlation between severe or hospitalized COVID-19 and educational attainment-related traits, including college or university degree ( $A2\_ALL$ ,  $rg = -0.24$ ,  $p = 8.51 \times 10^{-7}$ ;  $B2\_ALL$ ,  $rg = -0.32$ ,  $p = 1.78 \times 10^{-6}$ ) and fluid intelligence score ( $A2\_ALL$ ,  $rg = -0.25$ ,  $p = 2.40 \times 10^{-5}$ ;  $B2\_ALL$ ,  $rg = -0.26$ ,  $p = 7.66 \times 10^{-5}$ ). Hospitalized COVID-19 ( $B2\_ALL$ ,  $rg = 0.73$ ,  $p = 8.60 \times 10^{-6}$ ) is also significantly correlated with panic attacks.

We next estimated genetic correlations between COVID-19 and 80 diseases/traits from the GWAS Catalog<sup>4</sup> (Figure 1). Consistently, hypertension, type 2 diabetes, and obesity are significantly associated with severe or hospitalized COVID-19 (Table S1). Coronary artery disease, heart failure, and BMI are also modestly associated with severe COVID-19. Likewise, medication-taking traits related to obesity, diabetes, hypertension, and digestion are modestly associated with COVID-19, such as drugs for diabetes and antihypertensives (Table S1). Significant correlations are also found between hospitalized COVID-19 and drugs for peptic ulcer and gastro-esophageal reflux disease ( $B2\_ALL$ ,  $rg = 0.34$ ,  $p = 3.01 \times 10^{-5}$ ;  $B2\_ALL\_eur$ ,  $rg = 0.28$ ,  $p = 0.0006$ ), diuretic use and very severe respiratory confirmed COVID-19 ( $A2\_ALL$ ,  $rg = 0.25$ ,  $p = 0.0002$ ), opioids and severe or hospitalized COVID-19 ( $A2\_ALL$ ,  $rg = 0.30$ ,  $p = 5.59 \times 10^{-5}$ ;  $B2\_ALL$ ,  $rg = 0.44$ ,  $p = 4.78 \times 10^{-7}$ ;  $B2\_ALL\_eur$ ,  $rg = 0.38$ ,  $p = 0.0002$ ). Consistent with the findings from the UK biobank data, a strong negative genetic correlation between educational attainment and severe or hospitalized COVID-19 ( $A2\_ALL$ ,  $rg = -0.33$ ,  $p = 1.90 \times 10^{-9}$ ;  $B2\_ALL$ ,  $rg = -0.41$ ,  $p = 1.82 \times 10^{-8}$ ;  $B2\_ALL\_eur$ ,  $rg = -0.35$ ,  $p = 2.07 \times 10^{-6}$ ) is observed. Further analyses of brain function and personality traits show that COVID-19 is significantly correlated with cognitive performance and verbal-numerical reasoning, but not memory performance, reaction time, or neuroticism (Table S1). In addition, very severe respiratory confirmed COVID-19 ( $A2\_ALL$ ,  $rg = -0.37$ ,  $p = 0.0006$ ) is significantly correlated with systemic lupus erythematosus.

Although the genetic correlation alone does not explain the causal mechanism that might link two diseases, it provides evidence of potential causal relationships among genetic diseases, and potentially lead to new disease interventions. Here, our genetic correlation results between COVID-19 and a variety of traits and diseases confirm medical conditions and risk factors reported from epidemiological studies, such as hypertension, type 2 diabetes, and obesity. However, as far as we are aware, the association between opioids and COVID-19 has not previously been reported using epidemiological

data. As side effects associated with chronic opioid use at high doses may affect the immune system and increase the risk of pneumonia, there is an urgent need to evaluate the relationship between COVID-19 severity and opioid use by epidemiological studies.<sup>5</sup> Also, patients using chronic opioids may be considered a vulnerable group for careful monitoring. In addition, our results suggest that immune pathways involved in systemic lupus erythematosus may also play an important role in the severity of COVID-19. Finally, the observed negative correlation between COVID-19 severity and educational attainment reflects an indirect link mediated by environment or human behavior. For example, patients with different educational levels may differ in diet choices (BMI) or smoking status, and their occupations and/or living conditions may put them at higher risk of exposure to the virus. This study provides novel information on underlying conditions that might increase the risk of severe COVID-19 illness. Added epidemiological studies are warranted to further evaluate these findings.

## REFERENCES

- Richardson, S., Hirsch, J.S., Narasimhan, M., et al. (2020). Presenting characteristics, comorbidities, and outcomes among 5700 patients hospitalized with COVID-19 in the New York City area. *JAMA* **323**, 2052–2059.
- Severe Covid, G.G., Ellinghaus, D., Degenhardt, F., et al. (2020). Genome-wide association study of severe covid-19 with respiratory failure. *N. Engl. J. Med.* **383**, 1522–1534.
- Initiative, C.-H.G. (2020). The COVID-19 Host Genetics Initiative, a global initiative to elucidate the role of host genetic factors in susceptibility and severity of the SARS-CoV-2 virus pandemic. *Eur. J. Hum. Genet.* **28**, 715–718.
- Buniello, A., MacArthur, J.A.L., Cerezo, M., et al. (2019). The NHGRI-EBI GWAS Catalog of published genome-wide association studies, targeted arrays and summary statistics 2019. *Nucleic Acids Res.* **47**, D1005–D1012.
- Ataei, M., Shirazi, F.M., Lamarine, R.J., et al. (2020). A double-edged sword of using opioids and COVID-19: a toxicological view. *Subst. Abuse Treat. Prev. Policy* **15**, 91.

## ACKNOWLEDGMENTS

We thank the COVID-19 Host Genetics Initiative for making the data from the genome-wide association study available. This work was supported by Institutional Development Funds from the Children's Hospital of Philadelphia (to H.H.) and by National Institutes of Health (NIH) grants U01HG006830 (to H.H.).

## AUTHOR CONTRIBUTIONS

H.H. and X.C. designed the research and wrote the paper. X.C. and Y.L. performed the analysis. K.N., H.Q., and Y.L. collected the data and revised the paper. J.G., P.M.A.S., and H.H. supervised this study. All authors read and approved the final manuscript.

## DECLARATION OF INTERESTS

The authors declare no competing interest.

## SUPPLEMENTAL INFORMATION

Supplemental information can be found online at <https://doi.org/10.1016/j.xinn.2021.100112>.

**The Innovation, Volume 2**

**Supplemental Information**

**Genetic correlations between COVID-19  
and a variety of traits and diseases**

**Xiao Chang, Yun Li, Kenny Nguyen, Huiqi Qu, Yichuan Liu, Joseph Glessner, Patrick M.A. Sleiman, and Hakon Hakonarson**

## Supplementary Information:

### Estimation of genetic correlation

We calculated the genome-wide genetic correlations ( $r_g$ ) between COVID-19 and a variety of traits and diseases using LD score regression method [1], which is based on the relationship between LD score and  $\chi^2$ -statistics:  $E[\chi_j^2] \approx \frac{N_j h_g^2}{M} l_j + 1$ , where  $E[\chi_j^2]$  is the expected  $\chi^2$ -statistics between SNP  $j$  and the outcome,  $N_j$  is the sample size of study,  $M$  is the number of all variants, and  $l_j$  is the LD score of SNP  $j$  ( $l_j = \sum_k(j, k)$ ,  $k$  is other variants within the LD region).

The LD score regression equation is  $E[\beta_j \gamma_j] \approx \frac{\sqrt{N_1 N_2} r_g}{M} l_j + \frac{N_s r}{\sqrt{N_1 N_2}}$ , where  $\beta_j$  and  $\gamma_j$  denote the effect size of SNP  $j$  on the two tested traits,  $N_1$  and  $N_2$  are the sample sizes of two tested traits,  $N_s$  is the number of overlapping samples between two tested traits,  $r$  is the phenotypic correlation in overlapping samples and  $l_j$  is the aforementioned LD score. The LD score regression method has been implemented in the LDSC software (<https://github.com/bulik/ldsc>). Genetic correlation  $r_g$  between COVID-19 and interested diseases/traits were estimated by LDSC using GWAS summary statistics that overlap with HapMap3 SNPs as recommended [1]. Pre-computed linkage disequilibrium scores for HapMap3 SNPs calculated based on European-ancestry individuals from the 1000 Genomes Project were used in the analysis.

**Table S1. Genetic correlations between COVID-19 and a variety of diseases and other medically relevant traits**

| Source                                                           | Disease/Trait                                                | Reference          | A2_ALL      |           |             | B2_ALL      |            |             | B2_ALL_eur  |          |             | C2_ALL_eur  |        |       |
|------------------------------------------------------------------|--------------------------------------------------------------|--------------------|-------------|-----------|-------------|-------------|------------|-------------|-------------|----------|-------------|-------------|--------|-------|
|                                                                  |                                                              |                    | rg(se)      | P         | P-adj       | rg(se)      | P          | P-adj       | rg(se)      | P        | P-adj       | rg(se)      | P      | P-adj |
| UK<br>biobank                                                    | Diseases of the circulatory system                           | IX_CIRCULATORY     | 0.34 (0.08) | 2.20E-05* | 0.0342      | 0.38 (0.09) | 4.33E-05   | 0.0673      | 0.32 (0.10) | 0.0012   | 1           | 0.22 (0.11) | 0.0422 | 1     |
|                                                                  | Diseases of the digestive system                             | XI_DIGESTIVE       | 0.25 (0.07) | 0.0004    | 0.622       | 0.37 (0.08) | 5.38E-06** | 0.0083      | 0.38 (0.10) | 8.40E-05 | 0.1306      | 0.08 (0.09) | 0.3429 | 1     |
|                                                                  | Diseases of the musculoskeletal system and connective tissue | XIII_MUSCULOSKELET | 0.33 (0.07) | 1.38E-05* | 0.0215      | 0.35 (0.09) | 0.0001     | 0.1555      | 0.34 (0.10) | 0.001    | 1           | 0.15 (0.10) | 0.1371 | 1     |
|                                                                  | COPD, early/late onset                                       | COPD_EARLYANDLATER | 0.50 (0.15) | 0.0011    | 1           | 0.55 (0.16) | 0.0006     | 0.933       | 0.46 (0.17) | 0.0081   | 1           | 0.33 (0.18) | 0.0696 | 1     |
|                                                                  | COPD differential diagnosis                                  | COPD_EXCL          | 0.16 (0.10) | 0.1164    | 1           | 0.32 (0.11) | 0.0041     | 1           | 0.31 (0.13) | 0.0146   | 1           | 0.27 (0.14) | 0.0434 | 1     |
|                                                                  | Major coronary heart disease event                           | I9_CHD             | 0.24 (0.09) | 0.0088    | 1           | 0.26 (0.10) | 0.0117     | 1           | 0.19 (0.11) | 0.0786   | 1           | 0.07 (0.12) | 0.5347 | 1     |
|                                                                  | Ischaemic heart disease, wide definition                     | I9_IHD             | 0.24 (0.08) | 0.0014    | 1           | 0.30 (0.09) | 0.0006     | 0.933       | 0.22 (0.09) | 0.0155   | 1           | 0.14 (0.09) | 0.1447 | 1     |
|                                                                  | Vascular/heart problems diagnosed by doctor: Heart attack    | 6150_1             | 0.33 (0.09) | 0.0003    | 0.4665      | 0.35 (0.11) | 0.002      | 1           | 0.30 (0.12) | 0.0126   | 1           | 0.19 (0.12) | 0.1119 | 1     |
|                                                                  | Vascular/heart problems diagnosed by doctor: Angina          | 6150_2             | 0.28 (0.09) | 0.0017    | 1           | 0.36 (0.11) | 0.0014     | 1           | 0.26 (0.11) | 0.0169   | 1           | 0.23 (0.11) | 0.0339 | 1     |
| Vascular/heart problems diagnosed by doctor: High blood pressure | 6150_4                                                       | 0.17 (0.05)        | 0.0011      | 1         | 0.22 (0.07) | 0.0016      | 1          | 0.19 (0.07) | 0.0065      | 1        | 0.21 (0.08) | 0.0077      | 1      |       |

|                                                                        |                       |              |              |         |              |              |        |              |              |        |              |               |        |       |
|------------------------------------------------------------------------|-----------------------|--------------|--------------|---------|--------------|--------------|--------|--------------|--------------|--------|--------------|---------------|--------|-------|
| Non-cancer illness code, self-reported: stroke                         | 20002_1081            | 0.53 (0.22)  | 0.0158       | 1       | 0.50 (0.22)  | 0.0206       | 1      | 0.47 (0.23)  | 0.0452       | 1      | 0.32 (0.26)  | 0.2232        | 1      |       |
| Non-cancer illness code, self-reported: diabetes                       | 20002_1220            | 0.28 (0.08)  | 0.0003       | 0.4665  | 0.36 (0.09)  | 7.96E-05     | 0.1237 | 0.38 (0.10)  | 0.0003       | 0.4665 | 0.24 (0.09)  | 0.0092        | 1      |       |
| Non-cancer illness code, self-reported: osteoarthritis                 | 20002_1465            | 0.28 (0.10)  | 0.0042       | 1       | 0.27 (0.09)  | 0.0045       | 1      | 0.25 (0.10)  | 0.0164       | 1      | 0.02 (0.11)  | 0.8331        | 1      |       |
| Non-cancer illness code, self-reported: high cholesterol               | 20002_1473            | 0.19 (0.07)  | 0.0071       | 1       | 0.19 (0.08)  | 0.0172       | 1      | 0.19 (0.09)  | 0.0281       | 1      | 0.00 (0.08)  | 0.9863        | 1      |       |
| Smoking status: Never                                                  | 20116_0               | -0.06 (0.05) | 0.2025       | 1       | -0.22 (0.06) | 0.0005       | 0.7775 | -0.22 (0.07) | 0.0024       | 1      | -0.06 (0.07) | 0.4181        | 1      |       |
| Smoking status: Current                                                | 20116_2               | 0.20 (0.06)  | 0.0014       | 1       | 0.35 (0.08)  | 1.97E-05*    | 0.0306 | 0.34 (0.09)  | 0.0002       | 0.311  | 0.13 (0.09)  | 0.146         | 1      |       |
| Body mass index (BMI)                                                  | 21001_imt             | 0.24 (0.05)  | 3.35E-06**   | 0.0052  | 0.39 (0.08)  | 3.33E-07***  | 0.0005 | 0.32 (0.08)  | 3.89E-05     | 0.0604 | 0.25 (0.07)  | 0.0008        | 1      |       |
| Age hay fever, rhinitis or eczema diagnosed                            | 3761_imt              | 0.27 (0.08)  | 0.0005       | 0.7775  | 0.27 (0.10)  | 0.0064       | 1      | 0.28 (0.10)  | 0.0058       | 1      | 0.29 (0.13)  | 0.0245        | 1      |       |
| Age asthma diagnosed                                                   | 3786_imt              | 0.15 (0.09)  | 0.1012       | 1       | 0.12 (0.10)  | 0.2563       | 1      | 0.07 (0.12)  | 0.5406       | 1      | -0.03 (0.13) | 0.8299        | 1      |       |
| Fluid intelligence score                                               | 20016_imt             | -0.25 (0.06) | 2.40E-05*    | 0.0373  | -0.26 (0.07) | 7.66E-05*    | 0.1191 | -0.25 (0.08) | 0.001        | 1      | -0.13 (0.08) | 0.083         | 1      |       |
| Qualifications: College or University degree                           | 6138_1                | -0.24 (0.05) | 8.51E-07**   | 0.0013  | -0.32 (0.07) | 1.78E-06**   | 0.0028 | -0.28 (0.07) | 9.62E-05     | 0.1496 | -0.23 (0.07) | 0.0016        | 1      |       |
| Mental health problems ever diagnosed by a professional: Panic attacks | 20544_6               | 0.40 (0.12)  | 0.001        | 1       | 0.73 (0.16)  | 8.60E-06*    | 0.0134 | 0.64 (0.17)  | 0.0001       | 0.1555 | 0.38 (0.19)  | 0.0416        | 1      |       |
| Seen doctor (GP) for nerves, anxiety, tension or depression            | 2090                  | 0.18 (0.06)  | 0.002        | 1       | 0.20 (0.07)  | 0.0022       | 1      | 0.18 (0.07)  | 0.0087       | 1      | -0.03 (0.07) | 0.6765        | 1      |       |
| Medication related adverse effects (Asthma/COPD)                       | PULM_MEDICATIO_COMORB | 0.28 (0.10)  | 0.0059       | 1       | 0.32 (0.11)  | 0.0052       | 1      | 0.36 (0.12)  | 0.0022       | 1      | 0.15 (0.14)  | 0.2894        | 1      |       |
| Treatment/medication code: ramipril                                    | 20003_1140860806      | 0.31 (0.10)  | 0.0013       | 1       | 0.44 (0.12)  | 0.0004       | 0.622  | 0.34 (0.13)  | 0.0095       | 1      | 0.24 (0.13)  | 0.0565        | 1      |       |
| Treatment/medication code: simvastatin                                 | 20003_1140861958      | 0.26 (0.08)  | 0.001        | 1       | 0.26 (0.09)  | 0.0055       | 1      | 0.28 (0.10)  | 0.0046       | 1      | 0.07 (0.09)  | 0.432         | 1      |       |
| Treatment/medication code: tramadol                                    | 20003_1140864992      | 0.52 (0.13)  | 7.61E-05     | 0.1183  | 0.65 (0.15)  | 1.26E-05*    | 0.0196 | 0.63 (0.16)  | 5.30E-05     | 0.0824 | 0.49 (0.17)  | 0.0031        | 1      |       |
| Treatment/medication code: omeprazole                                  | 20003_1140865634      | 0.22 (0.09)  | 0.017        | 1       | 0.36 (0.10)  | 0.0004       | 0.622  | 0.30 (0.11)  | 0.0049       | 1      | 0.06 (0.13)  | 0.6624        | 1      |       |
| Treatment/medication code: aspirin                                     | 20003_1140868226      | 0.24 (0.09)  | 0.0067       | 1       | 0.32 (0.11)  | 0.0047       | 1      | 0.29 (0.12)  | 0.0162       | 1      | 0.17 (0.12)  | 0.1578        | 1      |       |
| Treatment/medication code: amitriptyline                               | 20003_1140879616      | 0.38 (0.13)  | 0.0031       | 1       | 0.49 (0.16)  | 0.0016       | 1      | 0.44 (0.16)  | 0.0059       | 1      | 0.22 (0.16)  | 0.167         | 1      |       |
| Treatment/medication code: metformin                                   | 20003_1140884600      | 0.23 (0.08)  | 0.0045       | 1       | 0.31 (0.10)  | 0.0015       | 1      | 0.33 (0.11)  | 0.0016       | 1      | 0.20 (0.10)  | 0.0427        | 1      |       |
| Treatment/medication code: co-codamol                                  | 20003_1140923346      | 0.40 (0.11)  | 0.0002       | 0.311   | 0.49 (0.13)  | 0.0001       | 0.1555 | 0.32 (0.13)  | 0.0171       | 1      | 0.07 (0.15)  | 0.6292        | 1      |       |
| Treatment/medication code: paracetamol                                 | 20003_2038460150      | 0.26 (0.07)  | 0.0003       | 0.4665  | 0.35 (0.09)  | 0.0002       | 0.311  | 0.27 (0.10)  | 0.0038       | 1      | -0.02 (0.10) | 0.814         | 1      |       |
| GWAS Catalog                                                           | ADHD                  | 30478444     | -0.23 (0.07) | 0.0017  | 0.136        | -0.26 (0.09) | 0.0021 | 0.168        | -0.23 (0.09) | 0.0079 | 0.632        | -0.05 (0.10)  | 0.5699 | 1     |
|                                                                        | Autism                | 30804558     | -0.01 (0.09) | 0.9165  | 1            | 0.08 (0.11)  | 0.4675 | 1            | 0.11 (0.11)  | 0.3164 | 1            | 0.08 (0.13)   | 0.546  | 1     |
|                                                                        | Depression            | 30718901     | -0.15 (0.05) | 0.0029  | 0.232        | -0.16 (0.06) | 0.0049 | 0.232        | -0.13 (0.06) | 0.0248 | 0.232        | 0.0219 (0.07) | 0.7407 | 0.232 |
|                                                                        | Schizophrenia         | 25056061     | -0.07 (0.05) | 0.1711  | 1            | -0.06 (0.06) | 0.3    | 1            | -0.08 (0.06) | 0.1469 | 1            | -0.04 (0.07)  | 0.6006 | 1     |
|                                                                        | Asthma                | 29785011     | -0.16 (0.08) | 0.037   | 1            | -0.12 (0.09) | 0.1763 | 1            | -0.15 (0.10) | 0.1386 | 1            | -0.27 (0.12)  | 0.0263 | 1     |
|                                                                        | Allergy               | 29785011     | -0.20 (0.07) | 0.0067  | 0.536        | -0.26 (0.09) | 0.0046 | 0.368        | -0.19 (0.10) | 0.0511 | 1            | -0.32 (0.12)  | 0.0078 | 0.624 |
|                                                                        | SLE                   | 26502338     | -0.37 (0.11) | 0.0006* | 0.048        | -0.27 (0.13) | 0.0489 | 1            | -0.27 (0.15) | 0.0736 | 1            | -0.23 (0.17)  | 0.1758 | 1     |

|                                                              |          |              |             |          |              |             |          |              |          |        |              |        |       |
|--------------------------------------------------------------|----------|--------------|-------------|----------|--------------|-------------|----------|--------------|----------|--------|--------------|--------|-------|
| Smoking (age of initiation)                                  | 30643251 | -0.23 (0.07) | 0.0008      | 0.064    | -0.32 (0.08) | 0.0001**    | 0.008    | -0.24 (0.08) | 0.0035   | 0.28   | -0.15 (0.09) | 0.0998 | 1     |
| Smoking (initiation)                                         | 30643251 | 0.10 (0.05)  | 0.0274      | 1        | 0.19 (0.06)  | 0.0005*     | 0.04     | 0.18 (0.06)  | 0.0026   | 0.208  | 0.05 (0.07)  | 0.4577 | 1     |
| Smoking (cessation)                                          | 30643251 | 0.27 (0.07)  | 0.0003*     | 0.024    | 0.42 (0.08)  | 3.60E-07*** | 2.88E-05 | 0.39 (0.09)  | 2.06E-05 | 0.0016 | 0.09 (0.11)  | 0.4288 | 1     |
| Smoking (cigarettes per day)                                 | 30643251 | 0.16 (0.06)  | 0.0048      | 0.384    | 0.26 (0.06)  | 3.88E-05**  | 0.0031   | 0.17 (0.07)  | 0.0097   | 0.776  | 0.00 (0.08)  | 0.9573 | 1     |
| Hypertension                                                 | 30940143 | 0.21 (0.06)  | 0.0005*     | 0.04     | 0.27 (0.08)  | 0.0005*     | 0.04     | 0.18 (0.07)  | 0.0077   | 0.616  | 0.18 (0.08)  | 0.022  | 1     |
| Coronary artery disease                                      | 28714975 | 0.22 (0.07)  | 0.001       | 0.08     | 0.20 (0.07)  | 0.0077      | 0.616    | 0.20 (0.08)  | 0.0113   | 0.904  | 0.11 (0.09)  | 0.207  | 1     |
| Heart failure                                                | 31919418 | 0.20 (0.09)  | 0.0205      | 1        | 0.24 (0.09)  | 0.0103      | 0.824    | 0.22 (0.11)  | 0.0468   | 1      | 0.17 (0.12)  | 0.1823 | 1     |
| Type 2 diabetes                                              | 25056061 | 0.22 (0.06)  | 0.0003*     | 0.024    | 0.31 (0.07)  | 3.75E-05**  | 0.003    | 0.29 (0.08)  | 0.0002   | 0.016  | 0.20 (0.08)  | 0.0107 | 0.856 |
| Obesity                                                      | 30677029 | 0.35 (0.13)  | 0.0082      | 0.656    | 0.55 (0.15)  | 0.0003*     | 0.024    | 0.55 (0.17)  | 0.0008   | 0.064  | 0.44 (0.17)  | 0.0092 | 0.736 |
| BMI                                                          | 23563607 | 0.26 (0.10)  | 0.0079      | 0.632    | 0.41 (0.13)  | 0.0016      | 0.128    | 0.29 (0.12)  | 0.0132   | 1      | 0.22 (0.15)  | 0.1477 | 1     |
| Drugs for peptic ulcer and gastro-oesophageal reflux disease | 31015401 | 0.23 (0.07)  | 0.0007      | 0.056    | 0.34 (0.08)  | 3.01E-05**  | 0.0024   | 0.28 (0.08)  | 0.0006   | 0.048  | 0.05 (0.10)  | 0.6493 | 1     |
| Drugs for diabetes                                           | 31015401 | 0.17 (0.07)  | 0.0214      | 1        | 0.24 (0.08)  | 0.004       | 0.32     | 0.26 (0.09)  | 0.0042   | 0.336  | 0.19 (0.10)  | 0.0524 | 1     |
| Antithrombotic agents                                        | 31015401 | 0.24 (0.09)  | 0.0085      | 0.68     | 0.28 (0.12)  | 0.0191      | 1        | 0.28 (0.12)  | 0.0266   | 1      | 0.29 (0.14)  | 0.0477 | 1     |
| Vasodilators for cardiac diseases                            | 31015401 | 0.33 (0.12)  | 0.0068      | 0.544    | 0.48 (0.16)  | 0.0021      | 0.168    | 0.43 (0.17)  | 0.0095   | 0.76   | 0.51 (0.21)  | 0.0151 | 1     |
| Antihypertensives                                            | 31015401 | 0.30 (0.12)  | 0.0163      | 1        | 0.41 (0.14)  | 0.0049      | 0.392    | 0.40 (0.16)  | 0.0098   | 0.784  | 0.22 (0.17)  | 0.1972 | 1     |
| Diuretic use                                                 | 31015401 | 0.25 (0.07)  | 0.0002*     | 0.016    | 0.26 (0.08)  | 0.0018      | 0.144    | 0.29 (0.09)  | 0.0011   | 0.088  | 0.25 (0.11)  | 0.0196 | 1     |
| Beta blocking agents                                         | 31015401 | 0.20 (0.07)  | 0.0078      | 0.624    | 0.22 (0.09)  | 0.0147      | 1        | 0.17 (0.09)  | 0.0762   | 1      | 0.09 (0.11)  | 0.3954 | 1     |
| Agents acting on the renin-angiotensin system                | 31015401 | 0.19 (0.06)  | 0.001       | 0.08     | 0.21 (0.08)  | 0.0062      | 0.496    | 0.22 (0.08)  | 0.0068   | 0.544  | 0.19 (0.09)  | 0.0357 | 1     |
| HMG CoA reductase inhibitors                                 | 31015401 | 0.22 (0.07)  | 0.0012      | 0.096    | 0.20 (0.08)  | 0.0121      | 0.968    | 0.22 (0.09)  | 0.0112   | 0.896  | 0.08 (0.09)  | 0.3783 | 1     |
| Opioids                                                      | 31015401 | 0.30 (0.07)  | 5.59E-05**  | 0.0045   | 0.44 (0.09)  | 4.78E-07*** | 3.82E-05 | 0.38 (0.10)  | 0.0002   | 0.016  | 0.26 (0.11)  | 0.0229 | 1     |
| Subjective well-being                                        | 27089181 | 0.17 (0.09)  | 0.0682      | 1        | 0.09 (0.10)  | 0.3818      | 1        | 0.11 (0.11)  | 0.311    | 1      | 0.14 (0.14)  | 0.3173 | 1     |
| Educational attainment (years of education)                  | 27225129 | -0.33 (0.06) | 1.90E-09*** | 1.52E-07 | -0.41 (0.07) | 1.82E-08*** | 1.46E-06 | -0.35 (0.07) | 2.07E-06 | 0.0002 | -0.24 (0.08) | 0.003  | 0.24  |
| Neuroticism                                                  | 27089181 | 0.00 (0.07)  | 0.9995      | 1        | -0.01 (0.09) | 0.9161      | 1        | -0.04 (0.10) | 0.6917   | 1      | -0.07 (0.12) | 0.5659 | 1     |
| Cognitive performance                                        | 30038396 | -0.22 (0.05) | 3.95E-06    | 0.0003   | -0.21 (0.06) | 0.0001**    | 0.008    | -0.20 (0.06) | 0.0006   | 0.048  | -0.22 (0.07) | 0.0034 | 0.272 |
| Memory performance                                           | 27046643 | 0.07 (0.10)  | 0.5018      | 1        | 0.07 (0.11)  | 0.5433      | 1        | 0.15 (0.11)  | 0.199    | 1      | 0.13 (0.12)  | 0.2675 | 1     |
| Reaction time                                                | 27046643 | 0.08 (0.08)  | 0.3163      | 1        | 0.03 (0.08)  | 0.6847      | 1        | -0.03 (0.09) | 0.7716   | 1      | -0.05 (0.11) | 0.6457 | 1     |
| Verbal-numerical reasoning                                   | 27046643 | -0.33 (0.09) | 0.0002*     | 0.016    | -0.33 (0.10) | 0.0007      | 0.056    | -0.35 (0.11) | 0.0018   | 0.144  | -0.30 (0.13) | 0.0164 | 1     |

Genetic correlation estimates, standard errors and p-values for COVID-19 and selected diseases/traits. The “Reference” column lists the phenotype code for the GWAS from UK biobank, and PMID (PubMed ID) for the GWAS from GWAS Catalog. The *P*-values are uncorrected *P*-values. Bonferroni correction was used for correction of multiple testing by the number of tests (1555 for the analysis of data from UK biobank, and 80 for the analysis of data

GWAS Catalog. For genetic correlations between COVID-19 and UK biobank traits, the significance level is  $0.05/1555 = 3.22 \times 10^{-5}$ . For genetic correlations between COVID-19 and GWAS catalog traits, the significance level is  $0.05/80 = 6.25 \times 10^{-4}$ . \*\*\* adjusted  $P$ -value  $\leq 0.001$ , \*\* adjusted  $P$ -value  $\leq 0.01$ , \* adjusted  $P$ -value  $\leq 0.05$ . BMI = body mass index; SLE = systemic lupus erythematosus; rg = genetic correlation estimates; se = standard error, A2\_ALL = very severe respiratory confirmed COVID-19 vs population, B2\_ALL = hospitalized COVID-19 vs population, B2\_ALL\_eur = hospitalized COVID-19 vs population (European samples only), C2\_ALL\_eur = COVID-19 vs population (European samples only).

1. Bulik-Sullivan BK, Loh PR, Finucane HK, Ripke S, Yang J, Schizophrenia Working Group of the Psychiatric Genomics C, *et al.* LD Score regression distinguishes confounding from polygenicity in genome-wide association studies. **Nat Genet** 2015, 47(3): 291-295.
